# Supplementary material
Source: ML conference proceedings conference paper supplement (https://aclanthology.org/D19-1515)
Supplement: Attachment [file SoftLabelCCRF_EMNLP2019 (1).pdf › SoftLabelCCRF_EMNLP2019 (1).pdf]

# Phrase Grounding by Soft-Label Chain Conditional Random Field – Supplementary Materials –

Jiacheng Liu    Julia Hockenmaier

University of Illinois at Urbana-Champaign, Urbana, IL, USA 61801

{j125, juliahmr}@illinois.edu

## 1 Correctness of the Modified Forward Algorithm for Soft-Label Chain CRFs

**Theorem.** *The modified forward algorithm computes the KL divergence loss for Soft-Label Chain CRFs.*

*Proof.* It is known that the iterations on forward variables  $\alpha$  computes partition function  $Z(\mathbf{x})$ . We only need to prove that

$$G = \sum_t \sum_{y^t, y^{t-1}} q(y^t, y^{t-1} | \mathbf{x}) s(y^t, y^{t-1}, \mathbf{x}) - \sum_t \sum_{y^t} q(y^t | \mathbf{x}) \log q(y^t | \mathbf{x})$$

We first prove by induction that

$$g_{y^t}^t = \sum_{t' < t} \sum_{y^{t'}, y^{t'-1}} q(y^{t'}, y^{t'-1} | \mathbf{x}) s(y^{t'}, y^{t'-1}, \mathbf{x}) - \sum_{t' < t} \sum_{y^{t'}} q(y^{t'} | \mathbf{x}) \log q(y^{t'} | \mathbf{x}) + \varepsilon(y^t, \mathbf{x}) - \log q_{y^t}^t$$

**Base Case:** When  $t = 0$ ,

$$g_{y^0}^0 = 0$$

**Induction:** By inductive hypothesis, we have

$$g_{y^{t-1}}^{t-1} = \sum_{t' < t-1} \sum_{y^{t'}, y^{t'-1}} q(y^{t'}, y^{t'-1} | \mathbf{x}) s(y^{t'}, y^{t'-1}, \mathbf{x}) - \sum_{t' < t-1} \sum_{y^{t'}} q(y^{t'} | \mathbf{x}) \log q(y^{t'} | \mathbf{x}) + \varepsilon(y^{t-1}, \mathbf{x}) - \log q_{y^{t-1}}^{t-1}$$

Therefore,

$$\begin{aligned} g_{y^t}^t &= \sum_{y^{t-1}} [g_{y^{t-1}}^{t-1} + \tau(y^t, y^{t-1}, \mathbf{x})] q_{y^{t-1}}^{t-1} \\ &\quad + \varepsilon(y^t, \mathbf{x}) - \log q_{y^t}^t \\ &= \sum_{t' < t-1} \sum_{y^{t'}, y^{t'-1}} q(y^{t'}, y^{t'-1} | \mathbf{x}) s(y^{t'}, y^{t'-1}, \mathbf{x}) \\ &\quad - \sum_{t' < t-1} \sum_{y^{t'}} q(y^{t'} | \mathbf{x}) \log q(y^{t'} | \mathbf{x}) \\ &\quad + \sum_{y^{t-1}} [s(y^t, y^{t-1}, \mathbf{x}) - \log q_{y^{t-1}}^{t-1}] q_{y^{t-1}}^{t-1} \\ &\quad + \varepsilon(y^t, \mathbf{x}) - \log q_{y^t}^t \\ &= \sum_{t' < t} \sum_{y^{t'}, y^{t'-1}} q(y^{t'}, y^{t'-1} | \mathbf{x}) s(y^{t'}, y^{t'-1}, \mathbf{x}) \\ &\quad - \sum_{t' < t} \sum_{y^{t'}} q(y^{t'} | \mathbf{x}) \log q(y^{t'} | \mathbf{x}) \\ &\quad + \varepsilon(y^t, \mathbf{x}) - \log q_{y^t}^t \end{aligned}$$

By following a similar derivation in the induction step, we have

$$\begin{aligned} G &= \sum_{y^T} g_{y^T}^T q_{y^T}^T \\ &= \sum_{t' < T} \sum_{y^{t'}, y^{t'-1}} q(y^{t'}, y^{t'-1} | \mathbf{x}) s(y^{t'}, y^{t'-1}, \mathbf{x}) \\ &\quad - \sum_{t' < T} \sum_{y^{t'}} q(y^{t'} | \mathbf{x}) \log q(y^{t'} | \mathbf{x}) \\ &\quad + \sum_{y^T} [s(y^T, y^{T-1}, \mathbf{x}) - \log q_{y^T}^T] q_{y^T}^T \\ &= \sum_t \sum_{y^t, y^{t-1}} q(y^t, y^{t-1} | \mathbf{x}) s(y^t, y^{t-1}, \mathbf{x}) \\ &\quad - \sum_t \sum_{y^t} q(y^t | \mathbf{x}) \log q(y^t | \mathbf{x}) \end{aligned}$$

□

---

**Algorithm 1** Modified forward algorithm to compute the KL divergence loss for Soft-Label Chain CRFs

---

```

procedure SOFTLABELCHAINCRFLOSS( $\mathbf{q}, \varepsilon(y^t, \mathbf{x}), \tau(y^t, y^{t-1}, \mathbf{x})$ )
  for all label  $y^0$  do
     $\alpha_{y^0}^0 \leftarrow 0$ 
     $g_{y^0}^0 \leftarrow 0$ 
  for  $t = 1 \dots T$  do
    for all label  $y^t$  do
       $\alpha_{y^t}^t \leftarrow \sum_{y^{t-1}} \left\{ \alpha_{y^{t-1}}^{t-1} \exp [\tau(y^t, y^{t-1}, \mathbf{x}) + \varepsilon(y^t, \mathbf{x})] \right\}$ 
       $g_{y^t}^t \leftarrow \sum_{y^{t-1}} \left\{ [g_{y^{t-1}}^{t-1} + \tau(y^t, y^{t-1}, \mathbf{x})] q_{y^{t-1}}^{t-1} + [\varepsilon(y^t, \mathbf{x}) - \log q_{y^t}^t] \right\}$ 
     $Z \leftarrow \sum_{y^T} \alpha_{y^T}^T$ 
     $G \leftarrow \sum_{y^T} g_{y^T}^T$ 
     $L \leftarrow -G + \log Z$ 
  return  $L$ 

```

---

## 2 Equivalence of Forward-Backward and Backpropagation in Soft-Label Chain CRFs

**Lemma.** Given forward and backward variables and partition function computed by the forward-backward algorithm

$$\begin{aligned}\alpha_{y^t}^t &= \sum_{y^{t-1}} \alpha_{y^{t-1}}^{t-1} \exp s(y^t, y^{t-1}, \mathbf{x}) \\ \beta_{y^{t-1}}^{t-1} &= \sum_{y^t} \beta_{y^t}^t \exp s(y^t, y^{t-1}, \mathbf{x}) \\ Z(\mathbf{x}) &= \sum_{y^T} \alpha_{y^T}^T\end{aligned}$$

We have

$$\frac{\partial Z(\mathbf{x})}{\partial \alpha_{y^t}^t} = \beta_{y^t}^t$$

*Proof.* By induction on  $t$ .

**Base case:** When  $t = T$ ,

$$\frac{\partial Z(\mathbf{x})}{\partial \alpha_{y^T}^T} = 1 = \beta_{y^T}^T$$

**Induction:**

$$\begin{aligned}\frac{\partial Z(\mathbf{x})}{\partial \alpha_{y^{t-1}}^{t-1}} &= \sum_{y^t} \frac{\partial Z(\mathbf{x})}{\partial \alpha_{y^t}^t} \frac{\partial \alpha_{y^t}^t}{\partial \alpha_{y^{t-1}}^{t-1}} \\ &= \sum_{y^t} \beta_{y^t}^t \exp s(y^t, y^{t-1}, \mathbf{x}) \\ &= \beta_{y^{t-1}}^{t-1}\end{aligned}$$

**Theorem.** Backpropagation on the loss of Soft-Label Chain CRFs gives gradient

$$\frac{\partial L}{\partial s(y^t, y^{t-1}, \mathbf{x})} = -q(y^t, y^{t-1} | \mathbf{x}) + p(y^t, y^{t-1} | \mathbf{x})$$

where

$$p(y^t, y^{t-1} | \mathbf{x}) = \frac{1}{Z(\mathbf{x})} \alpha_{y^{t-1}}^{t-1} \beta_{y^t}^t \exp s(y^t, y^{t-1}, \mathbf{x})$$

*Proof.* By induction on  $t$ .

**Base case:** When  $t = T$ ,

$$\begin{aligned}\frac{\partial L}{\partial s(y^T, y^{T-1}, \mathbf{x})} &= -q(y^T, y^{T-1} | \mathbf{x}) + \frac{1}{Z(\mathbf{x})} \frac{\partial Z(\mathbf{x})}{\partial s(y^T, y^{T-1}, \mathbf{x})} \\ &= -q(y^T, y^{T-1} | \mathbf{x}) + \frac{\alpha_{y^{T-1}}^{T-1} \exp s(y^T, y^{T-1}, \mathbf{x})}{Z(\mathbf{x})} \\ &= -q(y^T, y^{T-1} | \mathbf{x}) + p(y^T, y^{T-1} | \mathbf{x})\end{aligned}$$

**Induction:**

$$\begin{aligned}\frac{\partial L}{\partial s(y^t, y^{t-1}, \mathbf{x})} &= -q(y^t, y^{t-1} | \mathbf{x}) + \frac{1}{Z(\mathbf{x})} \frac{\partial Z(\mathbf{x})}{\partial s(y^t, y^{t-1}, \mathbf{x})} \\ &= -q(y^t, y^{t-1} | \mathbf{x}) + \frac{1}{Z(\mathbf{x})} \frac{\partial Z(\mathbf{x})}{\partial \alpha_{y^t}^t} \frac{\partial \alpha_{y^t}^t}{\partial s(y^t, y^{t-1}, \mathbf{x})} \\ &= -q(y^t, y^{t-1} | \mathbf{x}) + \frac{\beta_{y^t}^t \alpha_{y^{t-1}}^{t-1} \exp s(y^t, y^{t-1}, \mathbf{x})}{Z(\mathbf{x})} \\ &= -q(y^t, y^{t-1} | \mathbf{x}) + p(y^t, y^{t-1} | \mathbf{x})\end{aligned}$$

□

□
